# Supplementary figures and images for: The Mechanism of Peach Gum Polysaccharide Preventing UVB-Induced Skin Photoaging by Regulating Matrix Metalloproteinanse and Oxidative Factors
Source: MDPI journal article supplement (doi:10.3390/molecules28104104), 2023-05-15

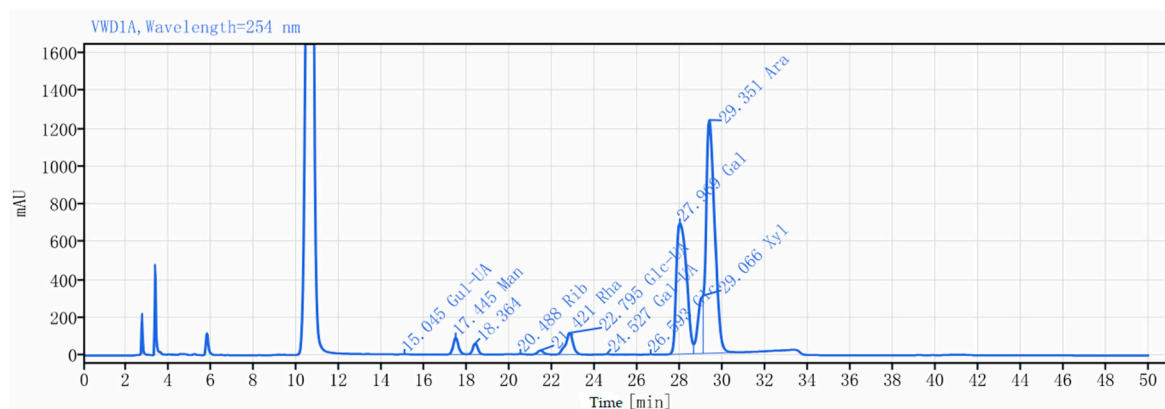

**Figure S1.** Monosaccharide chromatogram analysis supplementary materials.

Supplement: s1 [file s1]
